# Supplementary material for: Randomized, placebo-controlled window trial of EGFR, Src, or combined blockade in head and neck cancer
Source: JCI journal article supplement (doi:10.1172/jci.insight.90449), 2017-03-22

# Supplemental Figure 1 (cont'd). Biomarker Modulation

## delta.Cmet

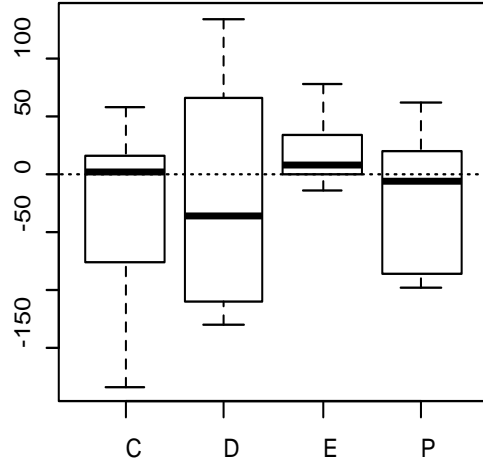

## delta.EGFR

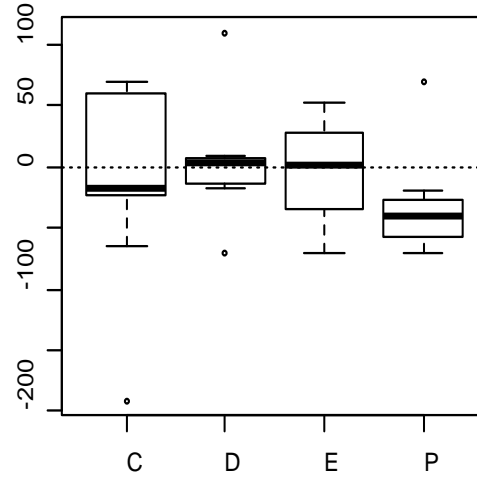

## delta.Vmentin

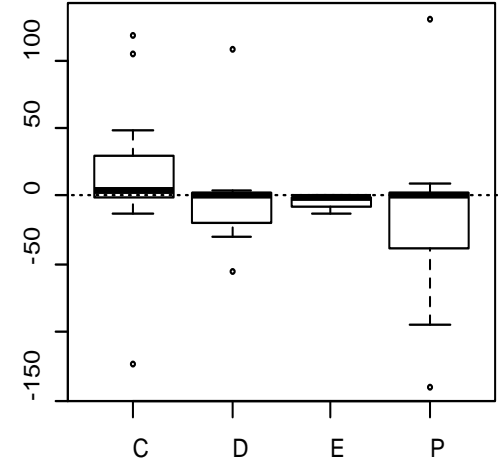

## delta.Ecadherin

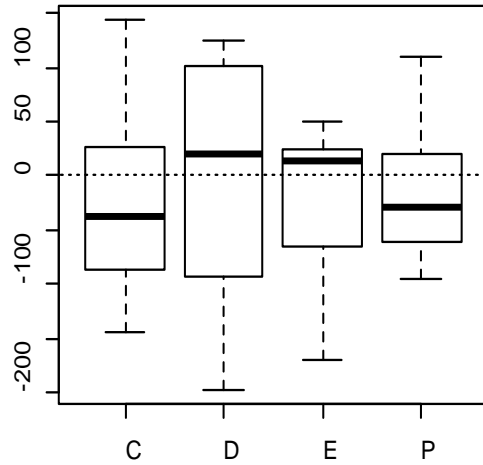

## delta.Her2

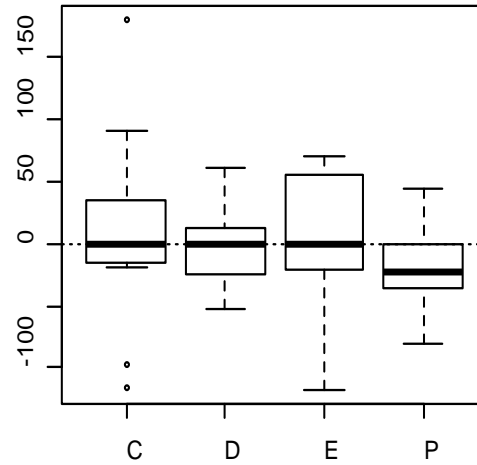

## delta.Her3

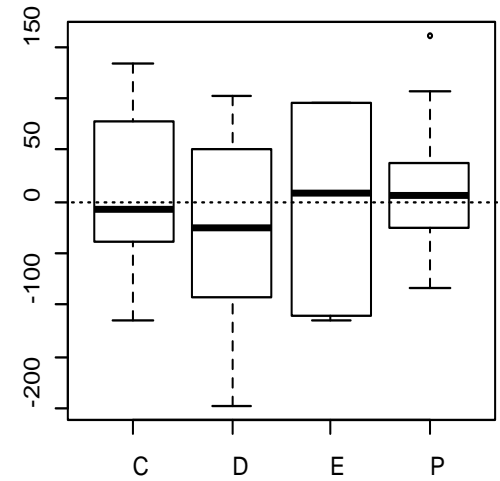

# Supplemental Figure 1. Biomarker Modulation

**percent.tumor.change**

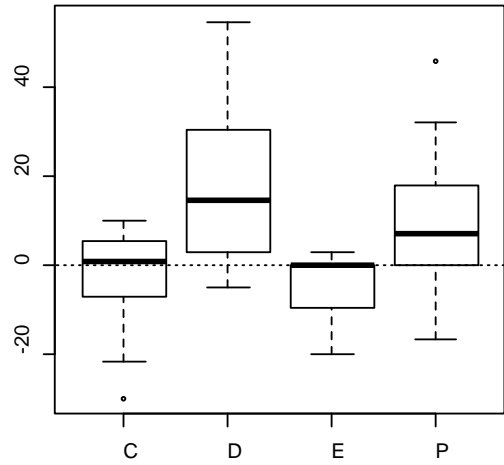

**delta.Ki67**

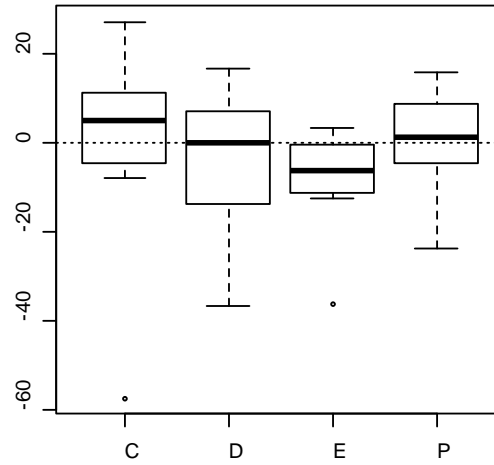

**delta.pSTAT1**

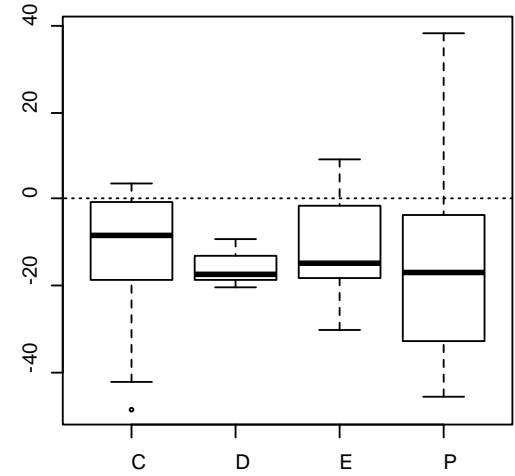

**delta.pSTAT3**

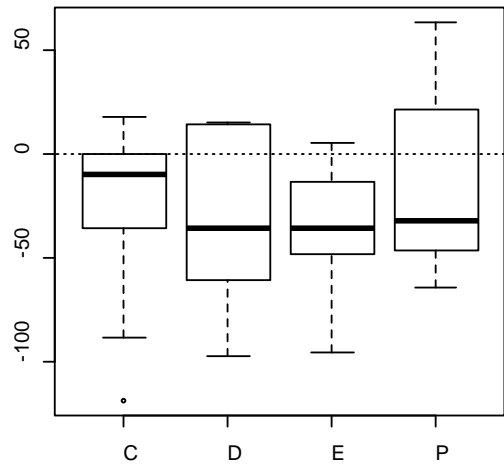

**delta.pAKT**

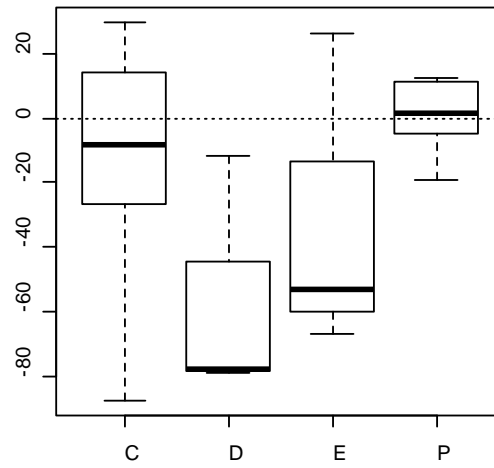

**delta.pSRC**

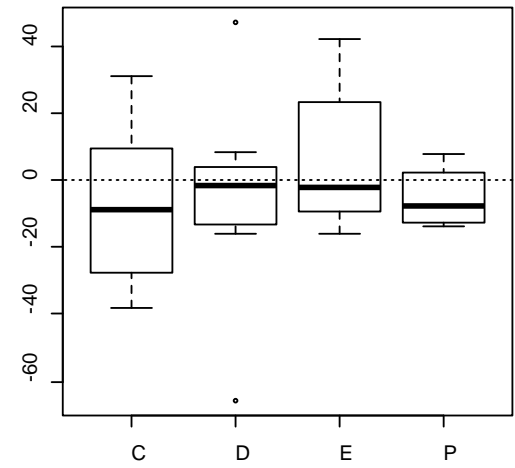

# Supplemental Figure 1 (cont'd). Biomarker Modulation

### delta.pMAPK

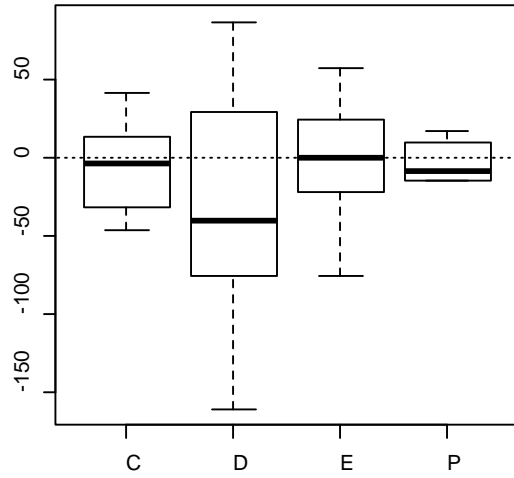

### delta.pEGFR

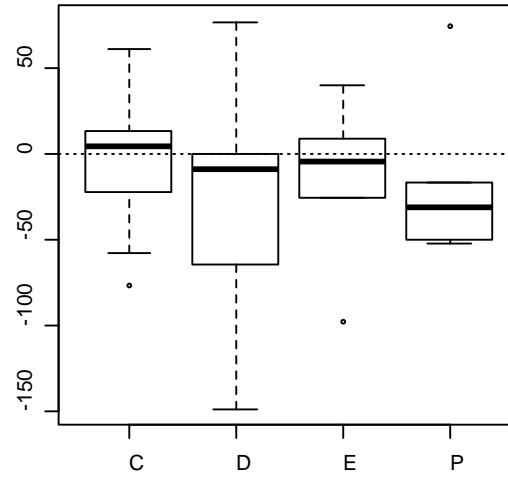

### delta.pMET

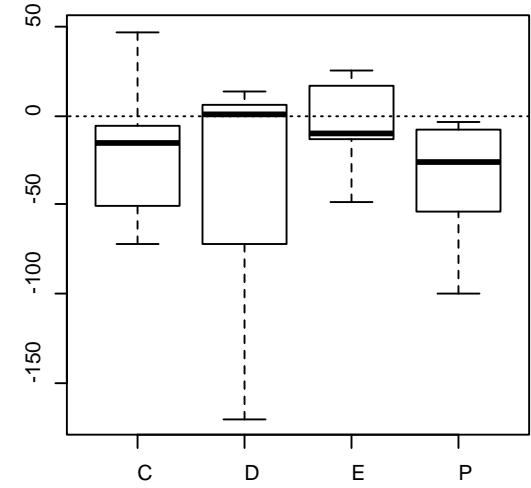

### delta.pFAK

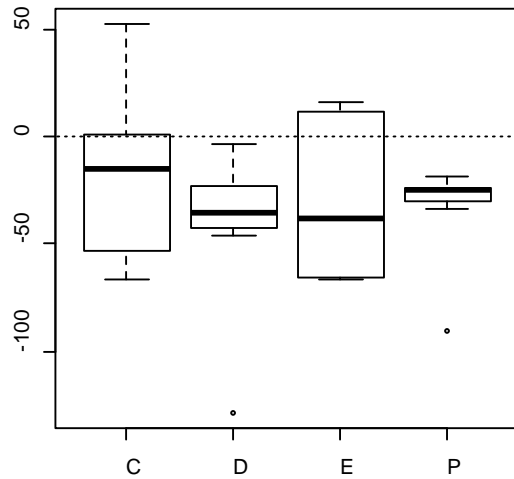

### delta.TGFalpha

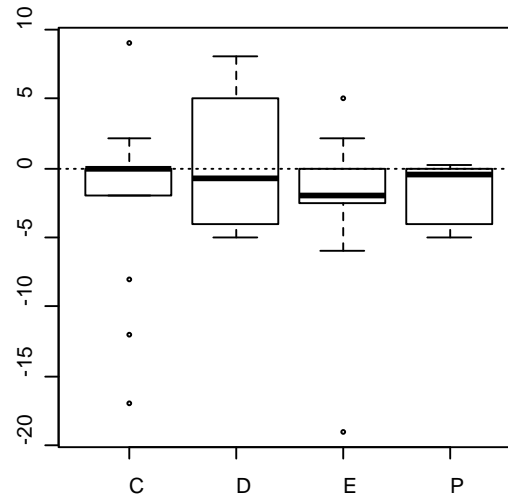

### delta.IL6

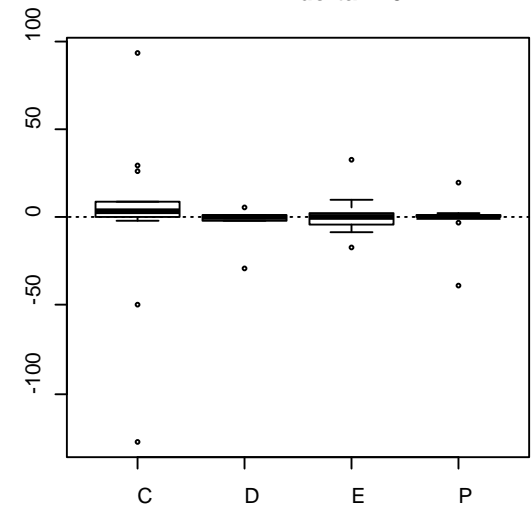

Supplement: sd1 [file 1]
